# Supplementary material
Source: PubMed Central journal article supplement (PMC5224883)
Supplement: NIHMS835831-supplement-Supplemental.pdf [file NIHMS835831-supplement-Supplemental.pdf]

## Electronic Supplementary Material

### Contents

|                               |   |
|-------------------------------|---|
| 1. Electronic Structure ..... | 2 |
| 2. Crystallography .....      | 3 |

# 1. Electronic Structure

The electronic spectra of Cu<sup>2+</sup> acetate complexes of ligands 1-6 (Table S1) have a charge transfer band with high extinction coefficient in the range of  $\lambda_{\max} = 274\text{-}306$  nm ( $\epsilon = 5,130\text{-}6,490$  M<sup>-1</sup> cm<sup>-1</sup>). The expected low intensity d-d transition occurs in a range of  $\lambda_{\max} = 668\text{-}728$  nm ( $\epsilon = 120\text{-}190$  M<sup>-1</sup> cm<sup>-1</sup>).

**Table S1.** Electronic spectra of Cu<sup>2+</sup> complexes

| Complex                 | Absorption wavelength in nm<br>(extinction coefficient M <sup>-1</sup> cm <sup>-1</sup> ) |           |
|-------------------------|-------------------------------------------------------------------------------------------|-----------|
|                         | CT band                                                                                   | d-d band  |
| [Cu1(OAc)] <sup>+</sup> | 274 (6,930)                                                                               | 668 (170) |
| [Cu2(OAc)] <sup>+</sup> | 284 (7,500)                                                                               | 686 (180) |
| [Cu3(OAc)] <sup>+</sup> | 275 (5,130)                                                                               | 687 (120) |
| [Cu4(OAc)] <sup>+</sup> | 298 (5,900)                                                                               | 692 (190) |
| [Cu5(OAc)] <sup>+</sup> | 306 (6,930)                                                                               | 708 (150) |
| [Cu6(OAc)] <sup>+</sup> | 306 (6,490)                                                                               | 728 (140) |

## 2. Crystallography

**Table S2.** Crystal Data and Structural Refinement Details

| formula                                | $\text{CuC}_{14}\text{H}_{29}\text{N}_4\text{F}_6\text{O}_2\text{P}$ | $\text{Cu}_2\text{C}_{30}\text{H}_{50}\text{N}_4\text{O}_7$ | $\text{CuC}_{29.50}\text{H}_{44}\text{N}_4\text{O}_{2.50}\text{PF}_6$ | $\text{ZnC}_{14}\text{H}_{31}\text{N}_4\text{O}_3\text{PF}_6$ | $\text{ZnC}_{16}\text{H}_{35}\text{N}_4\text{O}_3\text{PF}_6$ | $\text{CuC}_{12}\text{H}_{29}\text{N}_4\text{Cl}_5$ | $\text{CuC}_{13}\text{H}_{30}\text{N}_4\text{O}_5$ |
|----------------------------------------|----------------------------------------------------------------------|-------------------------------------------------------------|-----------------------------------------------------------------------|---------------------------------------------------------------|---------------------------------------------------------------|-----------------------------------------------------|----------------------------------------------------|
| formual wt.                            | 493.92                                                               | 642.29                                                      | 703.20                                                                | 513.77                                                        | 541.82                                                        | 470.19                                              | 385.95                                             |
| space group                            | P21/c                                                                | P-1                                                         | P-1                                                                   | I4 <sub>1</sub> /a                                            | R3c                                                           | Pbcm                                                | Pna2 <sub>1</sub>                                  |
| a(Å)                                   | 7.5846(7)                                                            | 9.8111(12)                                                  | 9.4251(13)                                                            | 15.6365(7)                                                    | 26.0448(15)                                                   | 7.5065(7)                                           | 16.7675(5)                                         |
| b(Å)                                   | 16.8061(13)                                                          | 13.5031(16)                                                 | 12.7961(18)                                                           | 15.6365(7)                                                    | 26.0448(15)                                                   | 13.3171(14)                                         | 8.2529(9)                                          |
| c(Å)                                   | 15.5964(14)                                                          | 13.8120(18)                                                 | 14.563(2)                                                             | 35.497(2)                                                     | 17.2741(13)                                                   | 19.872(3)                                           | 11.6715(12)                                        |
| α(deg)                                 | 90                                                                   | 64.046(9)                                                   | 70.445(11)                                                            | 90                                                            | 90                                                            | 90                                                  | 90                                                 |
| β(deg)                                 | 94.815(7)                                                            | 81.789(10)                                                  | 74.872(11)                                                            | 90                                                            | 90                                                            | 90                                                  | 90                                                 |
| γ(deg)                                 | 90                                                                   | 69.567(9)                                                   | 89.690(11)                                                            | 90                                                            | 120                                                           | 90                                                  | 90                                                 |
| V(Å <sup>3</sup> )                     | 1981.0(3)                                                            | 1541.6(3)                                                   | 1591.2(4)                                                             | 8679.0(8)                                                     | 10147.7(11)                                                   | 1986.5(4)                                           | 1615.1(2)                                          |
| Z                                      | 4                                                                    | 2                                                           | 2                                                                     | 16                                                            | 18                                                            | 4                                                   | 4                                                  |
| ρ <sub>calc</sub> (g/cm <sup>3</sup> ) | 1.656                                                                | 1.384                                                       | 1.468                                                                 | 1.573                                                         | 1.596                                                         | 1.572                                               | 1.587                                              |
| temp(K)                                | 150(2)                                                               | 150(2)                                                      | 150(2)                                                                | 150(2)                                                        | 150(2)                                                        | 150(2)                                              | 150(2)                                             |
| wavelength(Å)                          | 0.71073                                                              | 0.71073                                                     | 0.71073                                                               | 0.71073                                                       | 0.71073                                                       | 0.71073                                             | 0.71073                                            |
| abs. coeff.(mm <sup>-1</sup> )         | 1.256                                                                | 0.760                                                       | 0.808                                                                 | 1.279                                                         | 1.235                                                         | 1.773                                               | 1.384                                              |
| R1(F <sub>o</sub> <sup>2</sup> ) =     | 0.0399                                                               | 0.0897                                                      | 0.0580                                                                | 0.0390                                                        | 0.0371                                                        | 0.0451                                              | 0.0417                                             |
| wR2(F <sub>o</sub> <sup>2</sup> ) =    | 0.0860                                                               | 0.2757                                                      | 0.1812                                                                | 0.0903                                                        | 0.0722                                                        | 0.1237                                              | 0.1177                                             |

<sup>a</sup>[I > 2σ(I)] <sup>b</sup>wR1 = Σ||F<sub>o</sub>| - |F<sub>c</sub>||/Σ|F<sub>o</sub>| <sup>c</sup>wR2 = {Σw(F<sub>o</sub><sup>2</sup>-F<sub>c</sub><sup>2</sup>)<sup>2</sup>}/Σ[w(F<sub>o</sub><sup>2</sup>)<sup>2</sup>]<sup>1/2</sup> w = 1/[s<sup>2</sup>(F<sub>o</sub><sup>2</sup>) + (aP)<sup>2</sup> + bP] where P = (F<sub>o</sub><sup>2</sup> + 2F<sub>c</sub><sup>2</sup>)/3

**Table S3.** Selected bond lengths [ $\text{\AA}$ ] and angles [ $^\circ$ ]:

| [Cu(2)(OAc)][PF <sub>6</sub> ]            |            |                 |            |
|-------------------------------------------|------------|-----------------|------------|
| Cu(1)-N(3)                                | 2.014(2)   | Cu(1)-N(4)      | 2.0830(18) |
| Cu(1)-N(1)                                | 2.164(2)   | Cu(1)-O(1)      | 1.9565(17) |
| Cu(1)-N(2)                                | 2.0722(18) | Cu(1)-O(2)      | 2.576      |
| N(4)-Cu(1)-N(2)                           | 164.04(8)  | N(2)-Cu(1)-N(1) | 81.72(7)   |
| N(4)-Cu(1)-N(1)                           | 85.54(7)   | O(1)-Cu(1)-N(1) | 111.36(8)  |
| N(4)-Cu(1)-N(3)                           | 83.15(8)   | O(1)-Cu(1)-N(2) | 95.34(7)   |
| N(3)-Cu(1)-N(2)                           | 86.18(8)   | O(1)-Cu(1)-N(3) | 163.63(8)  |
| N(3)-Cu(1)-N(1)                           | 85.00(8)   | O(1)-Cu(1)-N(4) | 98.25(7)   |
| [Cu(5)(OAc)][OAc]                         |            |                 |            |
| N(1)-Cu(1)                                | 2.187(2)   | N(4)-Cu(1)      | 2.040(2)   |
| N(2)-Cu(1)                                | 2.190(8)   | Cu(1)-O(1)      | 1.9592(18) |
| N(3)-Cu(1)                                | 2.107(2)   | Cu(1)-O(2)      | 2.794      |
| O(1)-Cu(1)-N(4)                           | 160.45(9)  | N(3)-Cu(1)-N(1) | 176.11(8)  |
| O(1)-Cu(1)-N(3)                           | 88.47(8)   | O(1)-Cu(1)-N(2) | 112.85(9)  |
| N(4)-Cu(1)-N(3)                           | 85.49(9)   | N(4)-Cu(1)-N(2) | 86.05(9)   |
| O(1)-Cu(1)-N(1)                           | 94.36(8)   | N(3)-Cu(1)-N(2) | 92.91(9)   |
| N(4)-Cu(1)-N(1)                           | 92.67(9)   | N(1)-Cu(1)-N(2) | 83.53(9)   |
| [Cu(5)(OAc)][PF <sub>6</sub> ]            |            |                 |            |
| N(1)-Cu(1)                                | 2.147(2)   | N(4)-Cu(1)      | 2.056(2)   |
| N(2)-Cu(1)                                | 2.175(2)   | Cu(1)-O(1)      | 1.9469(18) |
| N(3)-Cu(1)                                | 2.104(2)   | Cu(1)-O(2)      | 2.887      |
| O(1)-Cu(1)-N(4)                           | 165.23(8)  | N(3)-Cu(1)-N(1) | 176.74(8)  |
| O(1)-Cu(1)-N(3)                           | 88.09(8)   | O(1)-Cu(1)-N(2) | 107.51(8)  |
| N(4)-Cu(1)-N(3)                           | 84.85(9)   | N(4)-Cu(1)-N(2) | 85.93(8)   |
| O(1)-Cu(1)-N(1)                           | 94.66(8)   | N(3)-Cu(1)-N(2) | 93.86(8)   |
| N(4)-Cu(1)-N(1)                           | 92.86(8)   | N(1)-Cu(1)-N(2) | 83.64(8)   |
| Zn(2)(OAc)(H <sub>2</sub> O) <sup>+</sup> |            |                 |            |
| N(1)-Zn(1)                                | 2.160(3)   | N(4)-Zn(1)      | 2.183(3)   |
| N(2)-Zn(1)                                | 2.195(2)   | O(1)-Zn(1)      | 2.0524(19) |
| N(3)-Zn(1)                                | 2.146(3)   | O(3)-Zn(1)      | 2.056(2)   |
| O(1)-Zn(1)-O(3)                           | 90.83(8)   | O(2)-H(15B)     | 1.79(2)    |
| O(1)-Zn(1)-N(3)                           | 90.31(9)   | N(3)-Zn(1)-N(4) | 83.81(11)  |
| O(3)-Zn(1)-N(3)                           | 175.89(11) | N(1)-Zn(1)-N(4) | 79.40(10)  |
| O(1)-Zn(1)-N(1)                           | 171.61(9)  | O(1)-Zn(1)-N(2) | 98.44(9)   |
| O(3)-Zn(1)-N(1)                           | 97.24(9)   | O(3)-Zn(1)-N(2) | 95.98(10)  |
| N(3)-Zn(1)-N(1)                           | 81.80(10)  | N(3)-Zn(1)-N(2) | 79.95(11)  |
| O(1)-Zn(1)-N(4)                           | 96.99(9)   | N(1)-Zn(1)-N(2) | 83.07(10)  |
| O(3)-Zn(1)-N(4)                           | 99.96(9)   | N(4)-Zn(1)-N(2) | 157.59(10) |
| Zn(1)(OAc)(H <sub>2</sub> O) <sup>+</sup> |            |                 |            |
| Zn(1)-N(1)                                | 2.159(3)   | Zn(1)-N(4)      | 2.197(3)   |
| Zn(1)-N(2)                                | 2.188(3)   | Zn(1)-O(1)      | 2.062(2)   |
| Zn(1)-N(3)                                | 2.155(3)   | Zn(1)-O(3)      | 2.135(3)   |
| N(1)-Zn(1)-N(2)                           | 83.49(11)  | O(1)-Zn(1)-O(3) | 88.70(10)  |
| N(1)-Zn(1)-N(3)                           | 83.44(11)  | O(1)-Zn(1)-N(1) | 171.70(11) |
| N(1)-Zn(1)-N(4)                           | 89.89(11)  | O(2)-H(17A)     | 1.75       |
| N(2)-Zn(1)-N(3)                           | 90.68(12)  | O(1)-Zn(1)-N(2) | 90.05(10)  |
| N(2)-Zn(1)-N(4)                           | 171.89(12) | O(1)-Zn(1)-N(3) | 91.46(11)  |
| N(3)-Zn(1)-N(4)                           | 83.90(11)  | O(1)-Zn(1)-N(4) | 96.09(10)  |

O(3)-Zn(1)-N(1) 97.42(11)  
O(3)-Zn(1)-N(2) 98.90(11)

O(3)-Zn(1)-N(3) 170.43(10)  
O(3)-Zn(1)-N(4) 86.56(10)

Cu(2)(CO<sub>3</sub>)

N(1)-Cu(1) 2.035(3)  
N(2)-Cu(1) 2.3383(19)  
N(3)-Cu(1) 2.035(3)  
N(4)-Cu(1) 2.363(2)  
O(2)-Cu(1)-O(1) 66.94(6)  
O(2)-Cu(1)-N(3) 104.08(11)  
O(1)-Cu(1)-N(3) 171.02(11)  
O(2)-Cu(1)-N(1) 170.73(11)  
O(1)-Cu(1)-N(1) 103.81(11)  
N(3)-Cu(1)-N(1) 85.17(7)  
O(2)-Cu(1)-N(2) 99.03(10)  
O(1)-Cu(1)-N(2) 101.37(10)

N(3)-Cu(1)-N(2) 79.73(12)  
N(1)-Cu(1)-N(2) 81.94(11)  
O(2)-Cu(1)-N(4) 101.88(11)  
O(1)-Cu(1)-N(4) 99.53(10)  
N(3)-Cu(1)-N(4) 81.96(11)  
N(1)-Cu(1)-N(4) 79.67(11)  
N(2)-Cu(1)-N(4) 154.88(7)  
Cu(1)-O(2) 1.994(3)  
Cu(1)-O(1) 1.985(3)  
O(3)-O(4) 2.890(5)  
O(3)-O(5) 2.908(5)
